# Supplementary material for: Comparative Analysis of Indoor Environmental Quality and Self-Reported Productivity in Intelligent and Traditional Buildings
Source: MDPI journal article supplement (doi:10.3390/en16186663), 2023-09-17
Supplement: s1 [file s1]

Archive with 1 entries (1 files):
- energies-2562787-supplementary.pdf
