# Supplementary material for: Comparative Analysis of Indoor Environmental Quality and Self-Reported Productivity in Intelligent and Traditional Buildings
Source: MDPI journal article supplement (doi:10.3390/en16186663), 2023-09-17
Supplement: s1 [file s1 › energies-2562787-supplementary.pdf]

## 1. Questionnaire

A completed example questionnaire with the questions considered in the paper has been presented below:

6. Jak oceniasz oświetlenie w tym pomieszczeniu?
- ☐ zbyt mocne (+1)      ☒ odpowiednie (0)      ☐ zbyt słabe (-1)
7. Jak oceniasz swoją aktualną produktywność (zdolność do przyswajania wiedzy)?
- ☐ wysoka (czyli lepsza niż zwykle) (+1)  
☒ normalna (czyli taka jak zwykle) (0)  
☐ słaba (czyli gorsza niż zwykle) (-1)
8. Jaka była Twoja aktywność fizyczna w czasie 30 min przed przyjściem do tego pomieszczenia?
- ☐ intensywny wysiłek fizyczny (np. dźwiganie ciężkich przedmiotów, aerobik, szybki bieg) (-2)  
☐ umiarkowany wysiłek fizyczny (np. noszenie lżejszych ciężarów, jazda rowerem, szybki marsz) (-1)  
☐ spacer, który trwał co najmniej 10 minut (0)  
☒ siedzenie (+1)
9. Jak oceniasz jakość powietrza w tym pomieszczeniu?
- ☐ bardzo dobra (+2)  
☒ dobra (+1)  
☐ ani dobra ani zła (0)  
☐ zła (-1)  
☐ bardzo zła (-2)
10. Jak ogólnie czujesz się w tym pomieszczeniu:
- ☐ bardzo dobrze (+2)  
☐ dobrze (+1)  
☒ obojętnie (0)  
☐ źle (-1)  
☐ bardzo źle (-2)
14. Proszę zaznaczyć swoje aktualne ubranie:
- a) ☐ podkoszulek bez rękawów      ☒ podkoszulek z krótkim rękawem  
☐ podkoszulek z długim rękawem
- b) ☐ rajstopy cienkie      ☐ rajstopy grube  
☒ skarpety cienkie      ☐ skarpety grube
- c) ☐ koszula cienka z krótkim rękawem      ☐ koszula cienka z długim rękawem  
☐ koszula gruba z krótkim rękawem      ☐ koszula gruba z długim rękawem  
☒ bluza cienka      ☐ bluza gruba  
☐ sweter/golf cienki      ☐ sweter/golf gruby  
☐ marynarka cienka      ☐ marynarka gruba  
☐ kurtka/płaszcz cienki      ☐ kurtka/płaszcz gruby
- d) ☒ spodnie cienkie      ☐ spodnie grube  
☐ krótkie spodenki      ☐ spódnica cienka  
☐ spódnica gruba  
☐ sukienka cienka      ☐ sukienka gruba
- e) ☐ sandały/japonki      ☐ trampki/tenisówki  
☒ półbuty/pantofle      ☐ kozaki krótkie/buty do kostek  
☐ kozaki długie

|            |                                                                                      |                  |
|------------|--------------------------------------------------------------------------------------|------------------|
| Metryczka: | Płeć: <input type="checkbox"/> kobieta <input checked="" type="checkbox"/> mężczyzna | Wzrost [cm]: 183 |
|            | Wiek w latach ukończonych: 20                                                        | Waga [kg]: 105   |

where the questions and answers translated into the English language are as follows:

6. How do you assess lighting conditions in this room?

too strong, appropriate, too weak

7. How do you rate your current productivity (your potential to absorb knowledge)?

strong (better than usual), normal (as usual), weak (worse than usual)

8. What was your past activity within 30 minutes before entering this room?

intense physical activity (e.g. lifting heavy objects, aerobic, running), moderate physical activity (e.g. lifting light objects, riding a bike, fast marching), walking of at least 10 minutes, sitting

9. How do you assess air quality in this room?

very good, good, neither good nor bad, bad, very bad

10. How do you generally feel in this room?

very good, good, neutral, bad, very bad

11. Mark the clothes you wear

a) T-shirt without sleeves, long sleeve T-shirt, short sleeve T-shirt

b) thin stockings, thick stockings, thin socks, thick socks

c) short sleeve thin shirt, long sleeve thin shirt, short sleeve thick shirt, long sleeve thick shirt, thin hoodie, thick hoodie, thin sweater, thick sweater, thin jacket, thick jacket, thin coat, thick coat

d) thin trousers, thick trousers, short trousers, thin skirt, thick skirt, thin dress, thick dress

e) sandals, sneakers, brogues, short boots, long boots

Table data: gender (woman, man), age, height, weight

## 2. Data of the buildings

**Table S1.** The main technical data of the analysed buildings.

| No. | Parameter                                       | Energis building               | Traditional buildings      |
|-----|-------------------------------------------------|--------------------------------|----------------------------|
| 1   | Completion year                                 | 2012                           | 1970 - 1985                |
| 2   | Number of above ground storeys                  | 4                              | 5                          |
| 3   | External wall (construction material/thickness) | ceramic hollow brick/<br>25 cm | sand-lime blocks/<br>25 cm |
| 4   | External walls' thermal insulation thickness    | 25 cm                          | 13 cm                      |
| 5   | U value of the external wall                    | 0.17 W/(m <sup>2</sup> K)      | 0.25 W/(m <sup>2</sup> K)  |
| 6   | Ventilation type                                | mechanical                     | natural                    |

## 3. Data of the rooms

**Table S2.** Data of the rooms where the tests took place (1-67: intelligent building, 68-92 traditional buildings with no fans installed).

| No | Surface area, m <sup>2</sup> | Cubature, m <sup>3</sup> | Windows' orientation | Heating/cooling systems                                                                                                                                  |
|----|------------------------------|--------------------------|----------------------|----------------------------------------------------------------------------------------------------------------------------------------------------------|
| 1  | 160.86                       | 466.49                   | W                    | Underfloor heating and supplementary radiators under the windows, cassette indoor units for hot air heating and cold air cooling (from rooftop chillers) |
| 2  | 63.91                        | 185.34                   | W                    | Underfloor heating, cassette indoor units for hot air heating and cold air cooling (from rooftop chillers)                                               |
| 3  | 160.86                       | 466.49                   | W                    | Underfloor heating and supplementary radiators under the windows, cassette indoor units for hot air heating and cold air cooling (from rooftop chillers) |
| 4  | 84.16                        | 244.06                   | E                    | Underfloor heating and supplementary radiators under the windows, cassette indoor units for hot air heating and cold air cooling (from rooftop chillers) |
| 5  | 57.43                        | 166.55                   | W                    | Underfloor heating, cassette indoor units for hot air                                                                                                    |

|    |        |         |         |                                                                                                                                                          |
|----|--------|---------|---------|----------------------------------------------------------------------------------------------------------------------------------------------------------|
|    |        |         |         | heating and cold air cooling (from rooftop chillers)                                                                                                     |
| 6  | 160.86 | 466.49  | W       | Underfloor heating and supplementary radiators under the windows, cassette indoor units for hot air heating and cold air cooling (from rooftop chillers) |
| 7  | 160.86 | 466.49  | W       | Underfloor heating and supplementary radiators under the windows, cassette indoor units for hot air heating and cold air cooling (from rooftop chillers) |
| 8  | 63.91  | 185.34  | W       | Underfloor heating, cassette indoor units for hot air heating and cold air cooling (from rooftop chillers)                                               |
| 9  | 57.43  | 166.55  | W       | Underfloor heating, cassette indoor units for hot air heating and cold air cooling (from rooftop chillers)                                               |
| 10 | 461.57 | 1430.87 | E, S, W | Underfloor heating and supplementary radiators under the windows, cassette indoor units for hot air heating and cold air cooling (from rooftop chillers) |
| 11 | 76.51  | 221.88  | E       | Underfloor heating and supplementary radiators under the windows, cassette indoor units for hot air heating and cold air cooling (from rooftop chillers) |
| 12 | 84.16  | 244.06  | E       | Underfloor heating and supplementary radiators under the windows, cassette indoor units for hot air heating and cold air cooling (from rooftop chillers) |
| 13 | 108.09 | 313.48  | W       | Underfloor heating and supplementary radiators under the windows, cassette indoor units for hot air heating and cold air cooling (from rooftop chillers) |
| 14 | 59.49  | 172.52  | W       | Underfloor heating, cassette indoor units for hot air heating and cold air cooling (from rooftop chillers)                                               |
| 15 | 58.17  | 168.69  | W       | Underfloor heating, cassette indoor units for hot air heating and cold air cooling (from rooftop chillers)                                               |
| 16 | 57.43  | 166.55  | W       | Underfloor heating, cassette indoor units for hot air heating and cold air cooling (from rooftop chillers)                                               |
| 17 | 43.33  | 125.66  | W       | Underfloor heating, cassette indoor units for hot air heating and cold air cooling (from rooftop chillers)                                               |
| 18 | 61.93  | 179.60  | W       | Underfloor heating, cassette indoor units for hot air heating and cold air cooling (from rooftop chillers)                                               |
| 19 | 43.33  | 125.66  | W       | Underfloor heating, cassette indoor units for hot air heating and cold air cooling (from rooftop chillers)                                               |
| 20 | 46.27  | 134.183 | W       | Underfloor heating, cassette indoor units for hot air heating and cold air cooling (from rooftop chillers)                                               |
| 21 | 59.49  | 172.52  | W       | Underfloor heating, cassette indoor units for hot air heating and cold air cooling (from rooftop chillers)                                               |
| 22 | 57.43  | 166.55  | W       | Underfloor heating, cassette indoor units for hot air heating and cold air cooling (from rooftop chillers)                                               |
| 23 | 47.48  | 137.69  | W       | Underfloor heating, cassette indoor units for hot air heating and cold air cooling (from rooftop chillers)                                               |
| 24 | 46.27  | 134.183 | W       | Underfloor heating, cassette indoor units for hot air heating and cold air cooling (from rooftop chillers)                                               |
| 25 | 46.27  | 134.183 | W       | Underfloor heating, cassette indoor units for hot air heating and cold air cooling (from rooftop chillers)                                               |
| 26 | 59.49  | 172.52  | W       | Underfloor heating, cassette indoor units for hot air heating and cold air cooling (from rooftop chillers)                                               |
| 27 | 43.33  | 125.66  | W       | Underfloor heating, cassette indoor units for hot air heating and cold air cooling (from rooftop chillers)                                               |

|    |        |         |         |                                                                                                                                                          |
|----|--------|---------|---------|----------------------------------------------------------------------------------------------------------------------------------------------------------|
| 28 | 46.27  | 134.183 | W       | Underfloor heating, cassette indoor units for hot air heating and cold air cooling (from rooftop chillers)                                               |
| 29 | 43.33  | 125.66  | W       | Underfloor heating, cassette indoor units for hot air heating and cold air cooling (from rooftop chillers)                                               |
| 30 | 50.56  | 146.62  | W       | Underfloor heating, cassette indoor units for hot air heating and cold air cooling (from rooftop chillers)                                               |
| 31 | 51.61  | 149.67  | W       | Underfloor heating, cassette indoor units for hot air heating and cold air cooling (from rooftop chillers)                                               |
| 32 | 47.48  | 137.69  | W       | Underfloor heating, cassette indoor units for hot air heating and cold air cooling (from rooftop chillers)                                               |
| 33 | 461.57 | 1430.87 | E, S, W | Underfloor heating and supplementary radiators under the windows, cassette indoor units for hot air heating and cold air cooling (from rooftop chillers) |
| 34 | 51.61  | 149.67  | W       | Underfloor heating, cassette indoor units for hot air heating and cold air cooling (from rooftop chillers)                                               |
| 35 | 461.57 | 1430.87 | E, S, W | Underfloor heating and supplementary radiators under the windows, cassette indoor units for hot air heating and cold air cooling (from rooftop chillers) |
| 36 | 57.43  | 166.55  | W       | Underfloor heating, cassette indoor units for hot air heating and cold air cooling (from rooftop chillers)                                               |
| 37 | 59.49  | 172.52  | W       | Underfloor heating, cassette indoor units for hot air heating and cold air cooling (from rooftop chillers)                                               |
| 38 | 58.17  | 168.69  | W       | Underfloor heating, cassette indoor units for hot air heating and cold air cooling (from rooftop chillers)                                               |
| 39 | 58.17  | 168.69  | W       | Underfloor heating, cassette indoor units for hot air heating and cold air cooling (from rooftop chillers)                                               |
| 40 | 461.57 | 1430.87 | E, S, W | Underfloor heating and supplementary radiators under the windows, cassette indoor units for hot air heating and cold air cooling (from rooftop chillers) |
| 41 | 160.86 | 466.49  | W       | Underfloor heating and supplementary radiators under the windows, cassette indoor units for hot air heating and cold air cooling (from rooftop chillers) |
| 42 | 43.33  | 125.66  | W       | Underfloor heating, cassette indoor units for hot air heating and cold air cooling (from rooftop chillers)                                               |
| 43 | 50.56  | 146.62  | W       | Underfloor heating, cassette indoor units for hot air heating and cold air cooling (from rooftop chillers)                                               |
| 44 | 61.93  | 179.60  | W       | Underfloor heating, cassette indoor units for hot air heating and cold air cooling (from rooftop chillers)                                               |
| 45 | 43.33  | 125.66  | W       | Underfloor heating, cassette indoor units for hot air heating and cold air cooling (from rooftop chillers)                                               |
| 46 | 59.49  | 172.52  | W       | Underfloor heating, cassette indoor units for hot air heating and cold air cooling (from rooftop chillers)                                               |
| 47 | 46.27  | 134.183 | W       | Underfloor heating, cassette indoor units for hot air heating and cold air cooling (from rooftop chillers)                                               |
| 48 | 61.93  | 179.60  | W       | Underfloor heating, cassette indoor units for hot air heating and cold air cooling (from rooftop chillers)                                               |
| 49 | 461.57 | 1430.87 | E, S, W | Underfloor heating and supplementary radiators under the windows, cassette indoor units for hot air heating and cold air cooling (from rooftop chillers) |
| 50 | 46.27  | 134.183 | W       | Underfloor heating, cassette indoor units for hot air heating and cold air cooling (from rooftop chillers)                                               |

|    |        |         |   |                                                                                                                                                          |
|----|--------|---------|---|----------------------------------------------------------------------------------------------------------------------------------------------------------|
| 51 | 160.86 | 466.49  | W | Underfloor heating and supplementary radiators under the windows, cassette indoor units for hot air heating and cold air cooling (from rooftop chillers) |
| 52 | 58.17  | 168.69  | W | Underfloor heating, cassette indoor units for hot air heating and cold air cooling (from rooftop chillers)                                               |
| 53 | 50.56  | 146.62  | W | Underfloor heating, cassette indoor units for hot air heating and cold air cooling (from rooftop chillers)                                               |
| 54 | 57.43  | 166.55  | W | Underfloor heating, cassette indoor units for hot air heating and cold air cooling (from rooftop chillers)                                               |
| 55 | 46.27  | 134.183 | W | Underfloor heating, cassette indoor units for hot air heating and cold air cooling (from rooftop chillers)                                               |
| 56 | 58.17  | 168.69  | W | Underfloor heating, cassette indoor units for hot air heating and cold air cooling (from rooftop chillers)                                               |
| 57 | 108.09 | 313.48  | W | Underfloor heating and supplementary radiators under the windows, cassette indoor units for hot air heating and cold air cooling (from rooftop chillers) |
| 58 | 43.33  | 125.66  | W | Underfloor heating, cassette indoor units for hot air heating and cold air cooling (from rooftop chillers)                                               |
| 59 | 46.27  | 134.183 | W | Underfloor heating, cassette indoor units for hot air heating and cold air cooling (from rooftop chillers)                                               |
| 60 | 47.48  | 137.69  | W | Underfloor heating, cassette indoor units for hot air heating and cold air cooling (from rooftop chillers)                                               |
| 61 | 43.33  | 125.66  | W | Underfloor heating, cassette indoor units for hot air heating and cold air cooling (from rooftop chillers)                                               |
| 62 | 46.27  | 134.183 | W | Underfloor heating, cassette indoor units for hot air heating and cold air cooling (from rooftop chillers)                                               |
| 63 | 58.17  | 168.69  | W | Underfloor heating, cassette indoor units for hot air heating and cold air cooling (from rooftop chillers)                                               |
| 64 | 59.49  | 172.52  | W | Underfloor heating, cassette indoor units for hot air heating and cold air cooling (from rooftop chillers)                                               |
| 65 | 63.91  | 185.34  | W | Underfloor heating, cassette indoor units for hot air heating and cold air cooling (from rooftop chillers)                                               |
| 66 | 160.86 | 466.49  | W | Underfloor heating and supplementary radiators under the windows, cassette indoor units for hot air heating and cold air cooling (from rooftop chillers) |
| 67 | 59.49  | 172.52  | W | Underfloor heating, cassette indoor units for hot air heating and cold air cooling (from rooftop chillers)                                               |
| 68 | 96.0   | 284.16  | E | Heating only, radiators under the windows                                                                                                                |
| 69 | 96.0   | 284.16  | E | Heating only, radiators under the windows                                                                                                                |
| 70 | 48.98  | 136.66  | W | Heating only, radiators under the windows                                                                                                                |
| 71 | 41.69  | 116.31  | W | Heating only, radiators under the windows                                                                                                                |
| 72 | 24.79  | 69.17   | W | Heating only, radiators under the windows                                                                                                                |
| 73 | 48.98  | 136.66  | W | Heating only, radiators under the windows                                                                                                                |
| 74 | 49.94  | 139.34  | W | Heating only, radiators under the windows                                                                                                                |
| 75 | 50.54  | 141.01  | W | Heating only, radiators under the windows                                                                                                                |
| 76 | 24.55  | 68.51   | W | Heating only, radiators under the windows                                                                                                                |
| 77 | 41.69  | 116.31  | W | Heating only, radiators under the windows                                                                                                                |
| 78 | 50.54  | 141.01  | W | Heating only, radiators under the windows                                                                                                                |
| 79 | 96.0   | 284.16  | W | Heating only, radiators under the windows                                                                                                                |
| 80 | 146.38 | 545.99  | W | Heating only, radiators under the windows                                                                                                                |
| 81 | 146.38 | 545.99  | W | Heating only, radiators under the windows                                                                                                                |

|    |        |         |      |                                           |
|----|--------|---------|------|-------------------------------------------|
| 82 | 46.62  | 155.72  | W    | Heating only, radiators under the windows |
| 83 | 48.03  | 159.95  | W    | Heating only, radiators under the windows |
| 84 | 65.18  | 214.43  | W    | Heating only, radiators under the windows |
| 85 | 149.63 | 594.01  | W    | Heating only, radiators under the windows |
| 86 | 67.10  | 216.75  | W    | Heating only, radiators under the windows |
| 87 | 248.18 | 1228.47 | E, W | Heating only, radiators under the windows |
| 88 | 132.88 | 556.77  | W    | Heating only, radiators under the windows |
| 89 | 65.29  | 212.83  | E    | Heating only, radiators under the windows |
| 90 | 128.58 | 541.33  | E    | Heating only, radiators under the windows |
| 91 | 128.58 | 541.33  | E    | Heating only, radiators under the windows |
| 92 | 128.58 | 541.33  | E    | Heating only, radiators under the windows |

#### 4. Frequency count

**Table S3.** General sensation vote – frequency count, %

| Vote | Energis building | Traditional buildings |
|------|------------------|-----------------------|
| -2   | 0.56             | 3.88                  |
| -1   | 10.22            | 15.05                 |
| 0    | 42.81            | 43.45                 |
| 1    | 42.02            | 33.25                 |
| 2    | 4.38             | 4.37                  |

**Table S4.** Indoor air quality vote – frequency count, %

| Vote | Energis building | Traditional buildings |
|------|------------------|-----------------------|
| -2   | 0.56             | 3.64                  |
| -1   | 7.19             | 12.86                 |
| 0    | 50.9             | 52.67                 |
| 1    | 37.98            | 27.91                 |
| 2    | 3.37             | 2.91                  |

**Table S5.** Light intensity assessment – frequency count, %

| Vote | Energis building | Traditional buildings |
|------|------------------|-----------------------|
| -1   | 14.94            | 12.14                 |
| 0    | 82.92            | 85.19                 |
| 1    | 2.13             | 2.67                  |

**Table S6.** Self-reported productivity – frequency count, %

| Vote | Energis building | Traditional buildings |
|------|------------------|-----------------------|
| -1   | 22.13            | 28.88                 |
| 0    | 71.24            | 67.23                 |
| 1    | 6.63             | 3.88                  |
